# Supplementary material for: Dimeric allostery mechanism of the plant circadian clock photoreceptor ZEITLUPE
Source: PLoS Comput Biol. 2021 Jul 26;17(7):e1009168. doi: 10.1371/journal.pcbi.1009168 (PMC8341706; doi:10.1371/journal.pcbi.1009168)
Supplement: S3 Table — (XLSX) [file pcbi.1009168.s023.xlsx]

## Sheet: Sheet1
	State 1	State 2	State 3	State 4	State 5	State 6	State 7	State 8	State 9	State 10	State 11
State 1	0.906	0	0	0	0	0.093	0	0	0	0.001	0
State 2	0	0.993	0.007	0	0	0	0	0	0	0	0
State 3	0	0.085	0.915	0	0	0	0	0	0	0	0
State 4	0	0	0	1	0	0	0	0	0	0	0
State 5	0	0	0	0	0.879	0	0	0.069	0.044	0.008	0
State 6	0.074	0	0	0	0	0.924	0	0	0	0.002	0
State 7	0	0	0	0	0	0	0.849	0.132	0.019	0	0
State 8	0	0	0.003	0	0.013	0	0.043	0.897	0.044	0	0
State 9	0	0	0.007	0.007	0.011	0	0.003	0.048	0.894	0.029	0.001
State 10	0.011	0	0	0	0.001	0.01	0	0	0.004	0.969	0.004
State 11	0	0	0	0	0	0	0	0	0	0.011	0.989
